# Supplementary material for: TMEM16A overexpression contributes to tumor invasion and poor prognosis of human gastric cancer through TGF-β signaling
Source: Oncotarget. 2015 Mar 23;6(13):11585–99. doi: 10.18632/oncotarget.3412 (PMC4484478; doi:10.18632/oncotarget.3412)
Supplement: Supplementary file 1 [file oncotarget-06-11585-s001.pdf]

## SUPPLEMENTARY FIGURES AND TABLES

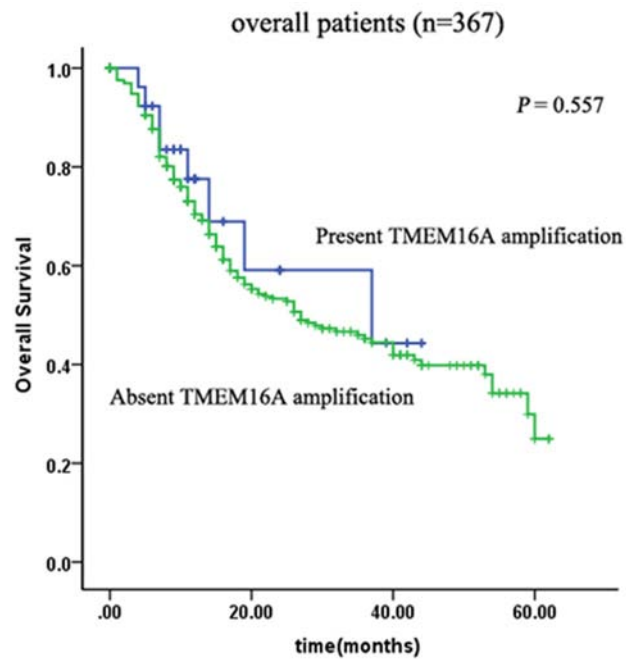

**Supplementary Figure S1: Kaplan–Meier estimated of overall survival according to TMEM16A amplification in patients with gastric cancer (log-rank test).** Amplification of TMEM16A was not significantly correlated with overall survival ( $p = 0.557$ ).

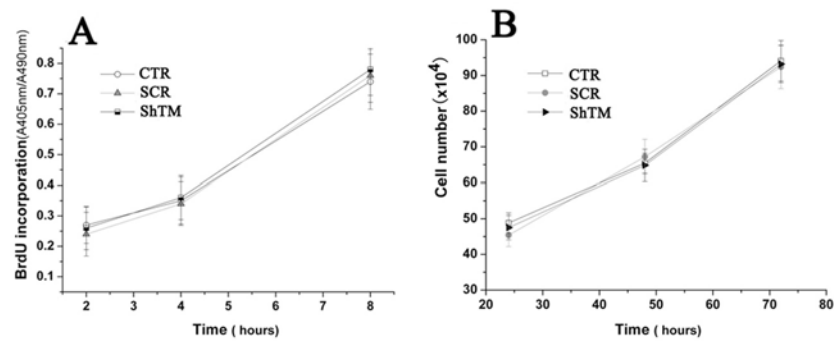

**Supplementary Figure S2: Knockdown of TMEM16A does not affect BGC-823 cell proliferation.** A. BrdU incorporation assay at 2 hours, 4 hours and 8 hours and B. cell count experiments at 24 hours, 48 hours and 72 hours from CTR group, SCR group and ShTM group ( $n = 6$ ,  $p > 0.05$ ).

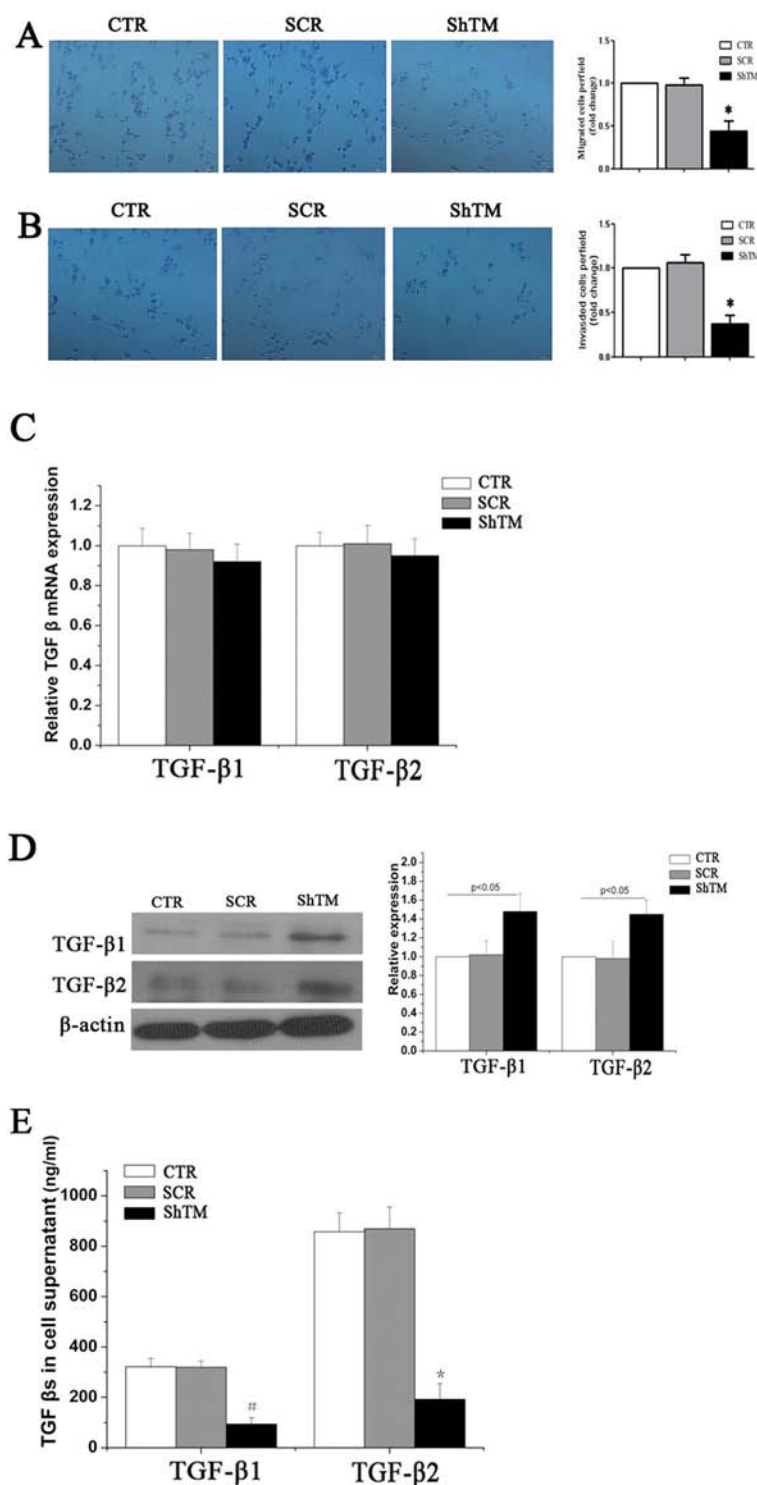

**Supplementary Figure S3: Knockdown of TMEM16A prevents the invasion and migration of BGC-823 cells by TGF-βs signalling.** A. The transwell migration assay and B. transwell invasion assay revealed TMEM16A knockdown reduced migration and invasion ( $n = 6$ ,  $*p < 0.05$  vs CTR group). C. Knockdown of TMEM16A did not affect mRNA expression of TGF-β1 and TGF-β2 in BGC-823 cells ( $n = 6$ ,  $p > 0.05$ ). D. Protein expression of TGF-β1 and TGF-β2 in BGC-823 cells increased when knockdown of TMEM16A as shown by western blot analysis ( $n = 6$ ,  $p < 0.05$  vs CTR group). E. Supernatant concentrations of TGF-β1 and TGF-β2 dramatically reduced when knockdown of TMEM16A as shown by ELISA ( $n = 6$ ,  $^{\#}p < 0.01$  vs CTR group,  $*p < 0.05$  vs CTR group).

(Continued)

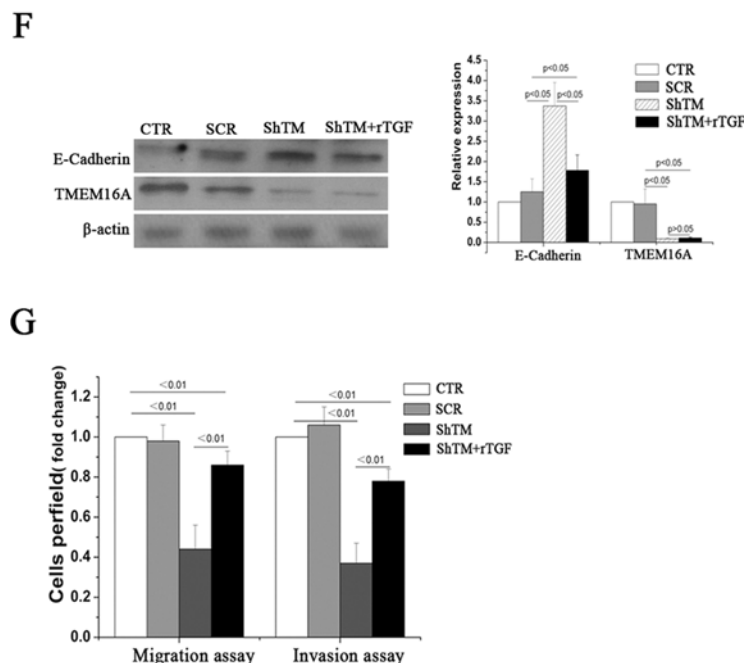

**Supplementary Figure S3 (Continued):** E. Supernatant concentrations of TGF- $\beta$ 1 and TGF- $\beta$ 2 dramatically reduced when knockdown of TMEM16A as shown by ELISA ( $n = 6$ ,  $\#p < 0.01$  vs CTR group,  $*p < 0.05$  vs CTR group). F. Adding recombinant purified TGF- $\beta$  increased E-cadherin expression in BGC-823 cells with TMEM16A knockdown ( $n = 6$ ). G. Supplement of recombinant purified TGF- $\beta$  increased the migration and invasion of cells with TMEM16A knockdown ( $n = 6$ ). CTR: control BGC-823, SCR: scrambled BGC-823, ShTM: shTMEM16A BGC-823.

**Supplementary Table S1. The correlation between TMEM16A expression and amplification in gastric cancer tissues**

| Variables             |            | All cases | TMEM16A expression |            | P value | Phi   |
|-----------------------|------------|-----------|--------------------|------------|---------|-------|
|                       |            |           | High(%)            | Low(%)     |         |       |
| TMEM16A amplification | Absent(%)  | 340       | 230(67.6%)         | 110(32.4%) | 0.021   | 0.120 |
|                       | Present(%) | 27        | 24(88.9%)          | 3(11.1%)   |         |       |

**Supplementary Table S2. Correlation of TMEM16A amplification and TMEM16A expression with patients' features in gastric cancer**

| Variables            | All cases | TMEM16A amplification<br>(overall patients <i>n</i> = 367) |         |                             | TMEM16A expression<br>(overall patients <i>n</i> = 367) |      |                             |
|----------------------|-----------|------------------------------------------------------------|---------|-----------------------------|---------------------------------------------------------|------|-----------------------------|
|                      |           | Absent                                                     | Present | <i>P</i> value <sup>a</sup> | Low                                                     | High | <i>P</i> value <sup>a</sup> |
| Gender               |           |                                                            |         |                             |                                                         |      |                             |
| Male                 | 256       | 235                                                        | 21      | 0.346                       | 74                                                      | 182  | 0.235                       |
| Female               | 111       | 105                                                        | 6       |                             | 39                                                      | 72   |                             |
| Age at surgery       |           |                                                            |         |                             |                                                         |      |                             |
| ≥57 <sup>b</sup>     | 191       | 174                                                        | 17      | 0.238                       | 51                                                      | 140  | 0.077                       |
| <57                  | 176       | 166                                                        | 10      |                             | 62                                                      | 114  |                             |
| Tumor location       |           |                                                            |         |                             |                                                         |      |                             |
| Upper half           | 193       | 179                                                        | 14      | 0.484                       | 57                                                      | 136  | 0.695                       |
| Lower half           | 158       | 145                                                        | 13      |                             | 52                                                      | 106  |                             |
| Whole                | 16        | 16                                                         | 0       |                             | 4                                                       | 12   |                             |
| Tumor size           |           |                                                            |         |                             |                                                         |      |                             |
| ≥5cm <sup>c</sup>    | 221       | 205                                                        | 16      | 0.916                       | 66                                                      | 155  | 0.636                       |
| <5cm                 | 146       | 135                                                        | 11      |                             | 47                                                      | 99   |                             |
| Histological type    |           |                                                            |         |                             |                                                         |      |                             |
| Intestinal           | 288       | 267                                                        | 21      | 0.927                       | 84                                                      | 204  | 0.198                       |
| Diffuse              | 79        | 73                                                         | 6       |                             | 29                                                      | 50   |                             |
| TNM                  |           |                                                            |         |                             |                                                         |      |                             |
| I + II               | 139       | 121                                                        | 18      | <b>0.001</b>                | 61                                                      | 78   | <b>0.000</b>                |
| III + IV             | 228       | 219                                                        | 9       |                             | 52                                                      | 176  |                             |
| Lymphnode metastasis |           |                                                            |         |                             |                                                         |      |                             |
| Present              | 249       | 236                                                        | 13      | <b>0.023</b>                | 57                                                      | 192  | <b>0.000</b>                |
| Absent               | 118       | 104                                                        | 14      |                             | 56                                                      | 62   |                             |

<sup>a</sup>chi-square test<sup>b</sup>median age<sup>c</sup>median tumor size

**Supplementary Table S3. Primers used for real-time PCR**

| Gene and primer |                  | Sequences(5' to 3')    |
|-----------------|------------------|------------------------|
| NM_000660.4     | TGF- $\beta$ 1_F | CCCACAACGAAATCTATGACAA |
|                 | TGF- $\beta$ 1_R | AAGATAACCACTCTGGCGAGTC |
| NM_001135599.2  | TGF- $\beta$ 2_F | ATTGCCCTCCTACAGACTTGAG |
|                 | TGF- $\beta$ 2_R | CAGCACAGAAGTTGGCATTGTA |
| NM_002046.3     | GAPDH_F          | GCACCGTCAAGGCTGAGAAC   |
|                 | GAPDH_R          | TGGTGAAGACGCCAGTGGA    |
